# Supplementary material for: A rationally designed macrocyclic cavitand that kills bacteria with high efficacy and good selectivity
Source: Royal Society of Chemistry journal article supplement (doi:10.1039/b617005f), 2007-01-01
Supplement: b617005f.pdf [file b617005f.pdf]

## **A Rationally Designed Macrocyclic Cavitand That Kills Bacteria with High Efficacy and Good Selectivity**

Jinny Choi, Jeeyeon Kim, Kimoon Kim<sup>\*</sup>, Sung-Tae Yang, Jae Il Kim and Sangyong Jon<sup>\*</sup>

**Synthesis of primary amine-modified CB[6] (1).** To a solution containing (allyloxy)<sub>12</sub>CB[6] (100 mg, 0.06 mmol) in methanol (1 mL) was added 2-aminoethanethiol (327.2 mg, 2.88 mmol). After degassing the solution under N<sub>2</sub> gas stream for 10 min, UV light (254 nm + 300 nm lamps) was irradiated to the solution for 24 h. After solvent was evaporated under a reduced pressure, the remained crude product was dissolved in water. To remove excess amount of unreacted free thiol reagent, dialysis was carried out in distilled water using a 1000 MWCO dialysis membrane for 2 days. After freeze-drying the dialyzed solution, primary amine-modified CB[6] (1) was obtained in white powder form. Further purification was done by reverse phase HPLC. <sup>1</sup>H NMR (300 MHz, D<sub>2</sub>O): δ 5.59 (br, 12H), 4.34 (br, 12H), 3.68 (br, 24H), 3.11 (br, 24H), 2.77 (br, 24H), 1.79 (br, 24H); MS (MALDI-TOF): *m/z* 2519.3 calcd for C<sub>94</sub>H<sub>161</sub>N<sub>35</sub>O<sub>24</sub>S<sub>11</sub> 2518.2 (n = number of modification at a parent CB[6]; n=11), 2443.4 calcd for C<sub>92</sub>H<sub>154</sub>N<sub>34</sub>O<sub>24</sub>S<sub>10</sub> 2441.0 (n=10), 2366.7 calcd for C<sub>90</sub>H<sub>147</sub>N<sub>33</sub>O<sub>24</sub>S<sub>9</sub> 2363.9 (n=9).

**Synthesis of secondary amine-modified CB[6] (2).** 2-(Butylamino)ethanethiol was dissolved in ethyl ether with stirring and then 35% aqueous HCl was added to get a protonated form of the aminothiols. After observation of white precipitation, the solvent was removed by evaporation. The remained solid was washed with ethyl ether and then

dried in vacuum. To a solution containing (allyloxy)<sub>12</sub>CB[6] (100 mg, 0.06 mmol) in methanol (1 mL) was added 2-(butylamino)ethanethiol•HCl salt (408 mg, 2.88 mmol). The following reaction and purification procedure is as same as that of synthesis of **1** described above. <sup>1</sup>H NMR (300 MHz, D<sub>2</sub>O): δ 5.56 (br, 12H), 4.36 (br, 12H), 3.25 (br, 24H), 3.18 (br, 24H), 3.16 (br, 24H), 2.87 (br, 24H), 2.70 (br, 24H), 1.96 (br, 24H); MS (MALDI-TOF): *m/z* 3265.1 calcd for C<sub>144</sub>H<sub>264</sub>N<sub>36</sub>O<sub>24</sub>S<sub>12</sub> 3268.6 (n = number of modification at a parent CB[6]; n=12), 3132.4 calcd for C<sub>138</sub>H<sub>249</sub>N<sub>35</sub>O<sub>24</sub>S<sub>11</sub> 3002.1 (n=11)

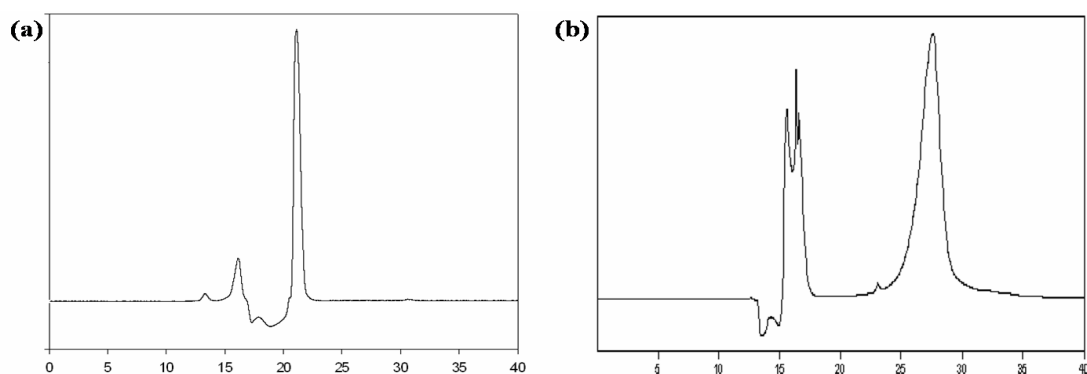

Figure S1. HPLC profiles of (a) compound **1** and (b) **2**

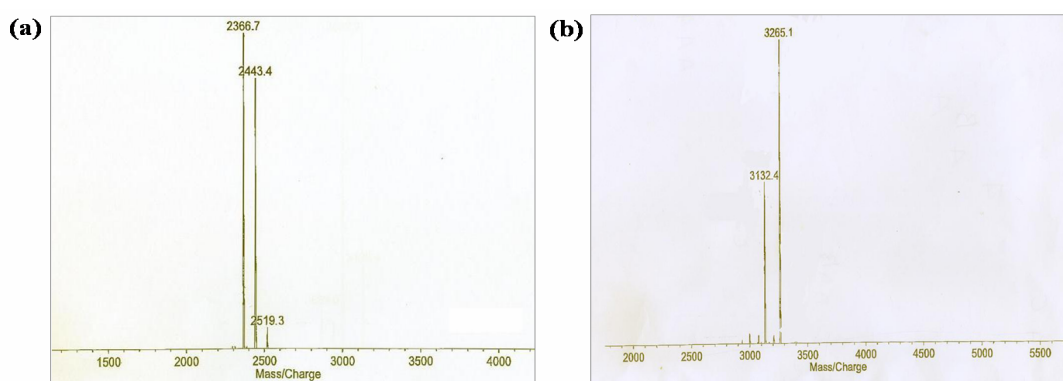

Figure S2. MALDI-TOF analysis of (a) compound **1** and (b) **2**

**Microorganisms.** *Escherichia coli* KCTC 1682, *Pseudomonas aeruginosa* KCTC 1637, *Salmonella typhimurium* KCTC 1926, , *Bacillus subtilis* KCTC 3068, *Staphylococcus epidermidis* KCTC 1917, and *Staphylococcus aureus* KCTC 1916 were purchased from the Korean Collection for Type Cultures (KCTC), Korea Research Institute of Bioscience & Biotechnology (KRIBB) (Daejeon, Korea). The clinical isolates of methicillin-resistant *Staphylococcus aureus* (MRSA) were supplied from Culture Collection of Antibiotics Resistant Microbes (CCARM) (Seoul, Korea).

**Antimicrobial activity.** The bacterial strains were grown at 37°C overnight in 5 mL of a Luria-Bertani (LB) medium. An aliquot of this culture was inoculated into 5ml of the fresh LB medium and incubated for additional 3-5 h at 37°C to obtain mid log phase (absorbance at 600 nm ( $A_{600}$ ) = 0.5) cells. The antimicrobial activities were examined as follows. A 2-fold dilution series of primary and secondary amine-modified CB[6] in culture medium (Mueller-Hinton broth) was prepared in 96 well plates (Nunc F96 microtiter plates). Aliquots (100  $\mu$ L) of bacterial suspension in culture medium were added to 100  $\mu$ L of aqueous amine-modified CB[6] solution. After incubation for 18-20 h at 37°C, the inhibition of bacterial growth was determined by naked eyes. The minimal inhibitory concentration was defined as the lowest concentration of amine-modified CB[6] that completely inhibited growth of the bacteria.

Bacterial suspension over MIC was spread on LB agar plate and incubated for 20 h to allow full colony development. The colonies were counted and MBC (minimal bactericidal concentration), the lowest concentration of amine-modified CB[6] that completely killed bacteria.

Table S1. MIC of conventional antibiotics against methicillin-resistant *Staphylococcus aureus* (MRSA) ( $\mu\text{g/mL}$ )

|          | Cephalothin | Erythromycin | Norfloxacin | Gentamicin | Oxacillin | Vancomycin |
|----------|-------------|--------------|-------------|------------|-----------|------------|
| MRSA3521 | 128         | >128         | 128         | 128        | >128      | 2          |
| MRSA3514 | 128         | >128         | >128        | 128        | >128      | $\leq 1$   |

**Preparation of small unilamellar vesicles (SUVs).** Calcein entrapped small unilamellar vesicles were prepared for the dye leakage experiment. Appropriate amounts of phospholipids were dissolved in chloroform and dried under a stream of nitrogen to form a thin lipid film and subsequently placed in a vacuum chamber overnight to remove residual traces of the organic solvent. The dried thin lipid films were hydrated with 2 mL Tris-HCl buffer (10 mM Tris-HCl pH 7.4, 154 mM NaCl, 0.1mM EDTA) containing 70 mM of calcein by vigorous vortex-mixing at 25°C combined with 5 freeze and thaw cycles using liquid nitrogen. The resulting lipid dispersions were sonicated for 20-30 min using a titanium-tipped sonicator until the solution was clear. Calcein-entrapped vesicles were separated from free calcein by gel filtration chromatography on a Sephadex-50 column using Tris-HCl buffer.

**Calcein leakage experiment.** The fluorescence intensity of calcein released from liposomes was monitored at 520 nm (excited at 490nm) on a Shimadzu RF-5301 spectrofluorometer. To measure the maximum fluorescence intensity for 100% dye leakage, 20  $\mu\text{L}$  of Triton X-100 (10% in Tris buffer) was added to dissolve the vesicles. The average percent leakage caused by the amine-modified CB[6] was calculated using the equation :

$$\% \text{ leakage} = 100 \times (F - F_0) / (F_t - F_0)$$

where  $F_0$  and  $F_t$  are the initial fluorescence intensities observed without treatment of the amine-modified CB[6] and after Triton X-100 treatment, respectively, and  $F$  is the fluorescence intensity observed with treatment of each amine-modified CB[6].

**Cell culture and cytotoxicity assay.** NIH3T3 cells were cultured in DMEM supplemented with 10% heat-inactivated FBS and antibiotics. Cells were grown at 37°C in humidified air containing 5% CO<sub>2</sub> and passaged every 3~4 days.

The cytotoxicity of the amine-modified CB[6] was measured by MTT assay. Cells were seeded in a 96-well tissue culture plate at an initial seeding density of  $5 \times 10^3$  cells per well in 200  $\mu\text{L}$  of growth medium. Cells achieving 70-80% confluence after 24 h were exposed to 100  $\mu\text{L}$  of serially diluted amine-modified CB[6] solution and then incubated for 12 h. Thereafter 20  $\mu\text{L}$  of stock solution of MTT (5 mg/mL in PBS buffer) were added to each well. After 4 h of incubation at 37°C, each medium was removed and 100  $\mu\text{L}$  of DMSO was added to each well. The optical densities of each well were measured at 570 nm by using a microplate reader and expressed as a percentage relative to control cells.
